# Supplementary material for: A transgenic resource for conditional competitive inhibition of conserved Drosophila microRNAs
Source: PubMed Central journal article supplement (PMC4471878; doi:10.1038/ncomms8279), 2015-06-17
Supplement: NIHMS684987-supplement-1.pdf [file NIHMS684987-supplement-1.pdf]

## Supplementary Figures

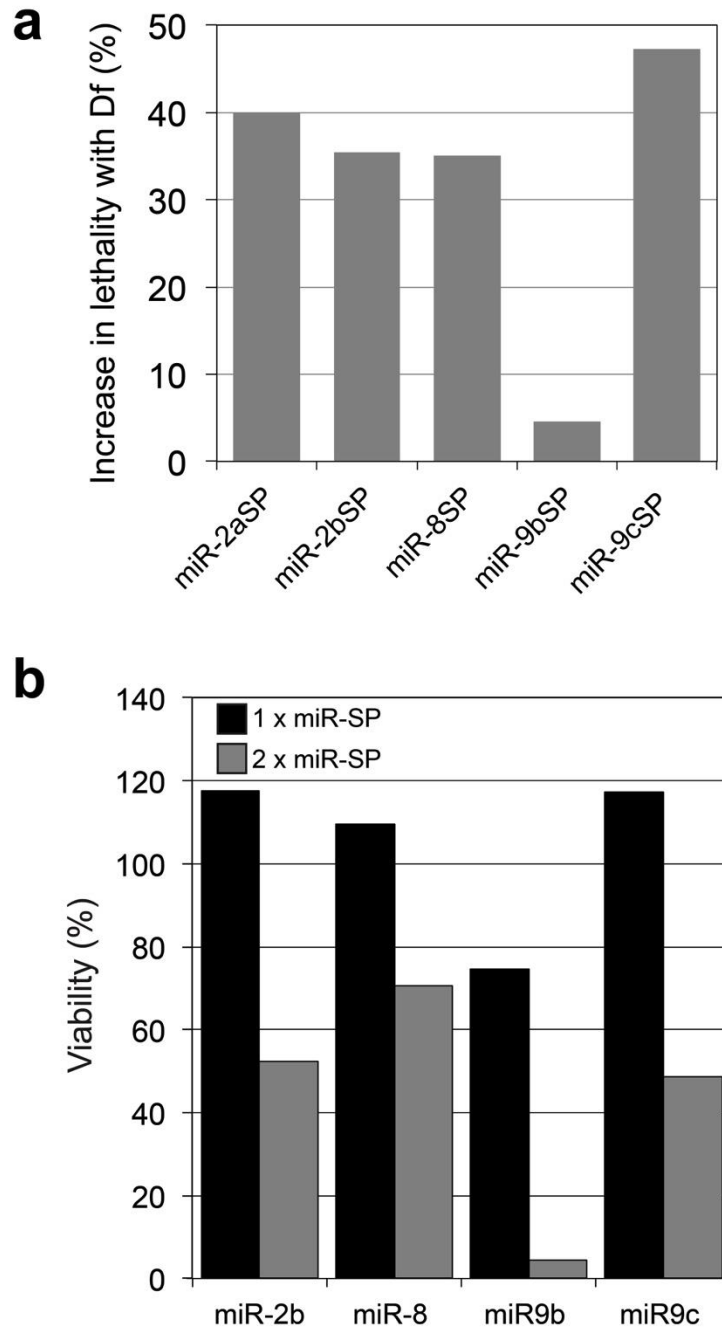

**Supplementary Figure 1: (a)**, Complementation assays were performed to determine if lethality induced by single insert expression (*tubulin-Gal4;1x miR-SP*) is enhanced by a deletion (Df) at the corresponding endogenous locus; *miR-2bSP*, *miR-8SP* and *miR-9cSP* show significant increased percentage (%) lethality with Df. **(b)**, Using adult viability as a basis of phenotypic comparison, outcomes from crosses of *tubulin-Gal4* to single insert (1x) or double insert (2x) SP lines are shown for four of the hits in the screen. All of these miR-SPs display dose-dependence.

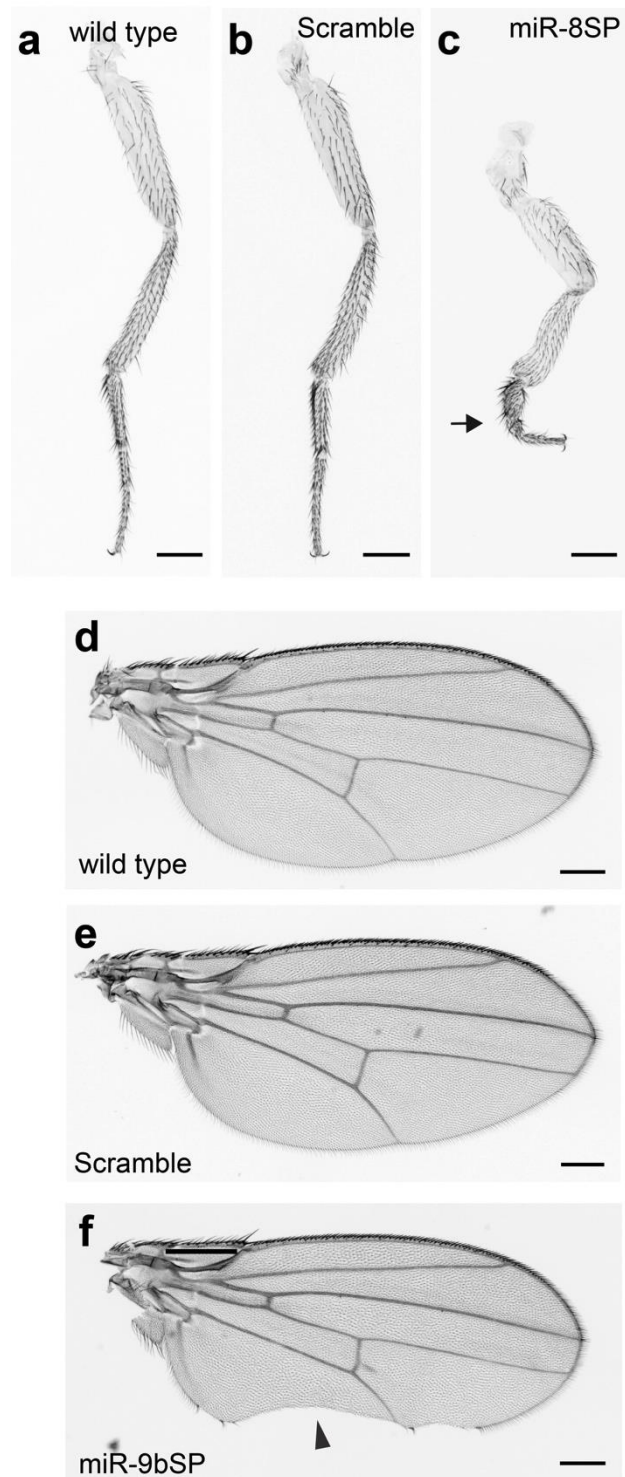

**Supplementary Figure 2:** Second generation miR-SP constructs recapitulate previously characterized miRNA LOF morphological phenotypes. **(a-c)** Adult third leg morphology from wild type control **(a)**,  $+/\textit{Scramble-SP};\textit{tubulin-Gal4}/\textit{Scramble-SP}$  **(b)**, and  $+/\textit{miR-8SP};\textit{tubulin-Gal4}/\textit{miR-8SP}$  **(c)** animals. **(d-f)** Cuticle preparations of wings from wild type control **(d)**,  $+/\textit{Scramble-SP};\textit{tubulin-Gal4}/\textit{Scramble-SP}$  **(e)**, and  $+/\textit{miR-9bSP};\textit{tubulin-Gal4}/\textit{miR-9bSP}$  **(f)** animals, Scale bars are 200µm.

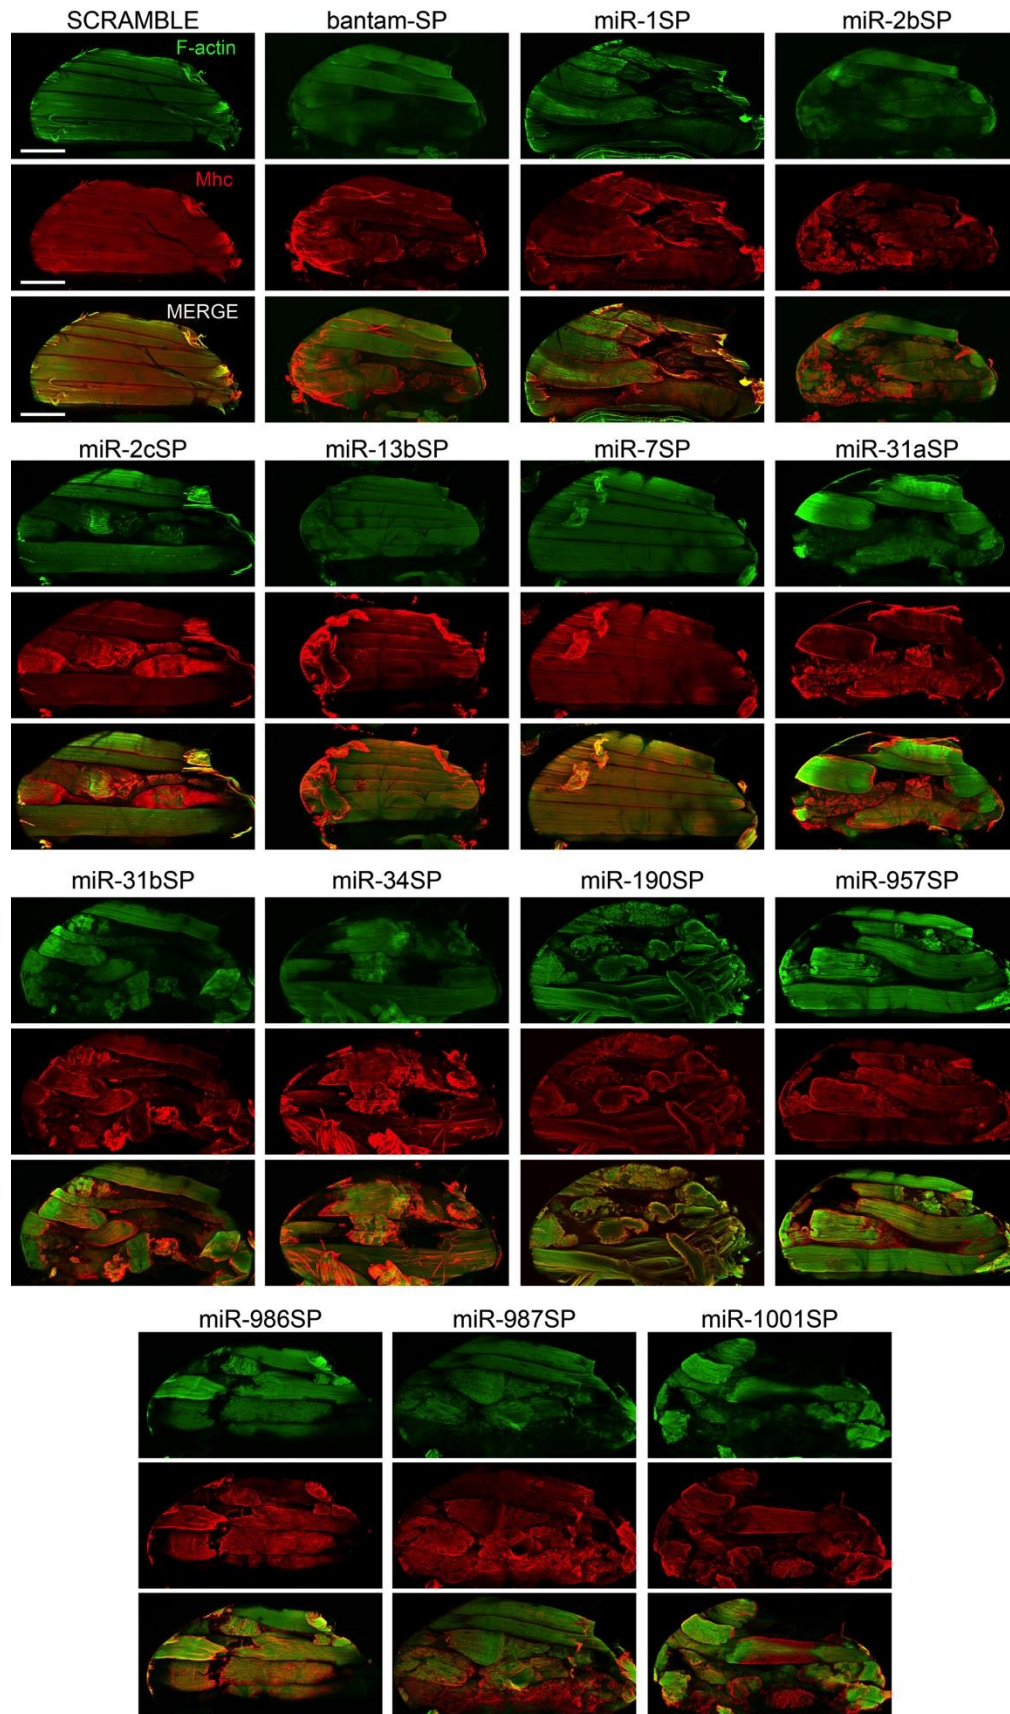

**Supplementary Figure 3:** IFM morphology phenotypes of all positive hits from the primary flight screen. Adult indirect flight muscle stained with anti-Mhc antibody (red) and phalloidin (green) Scale bars are 200 $\mu$ m.

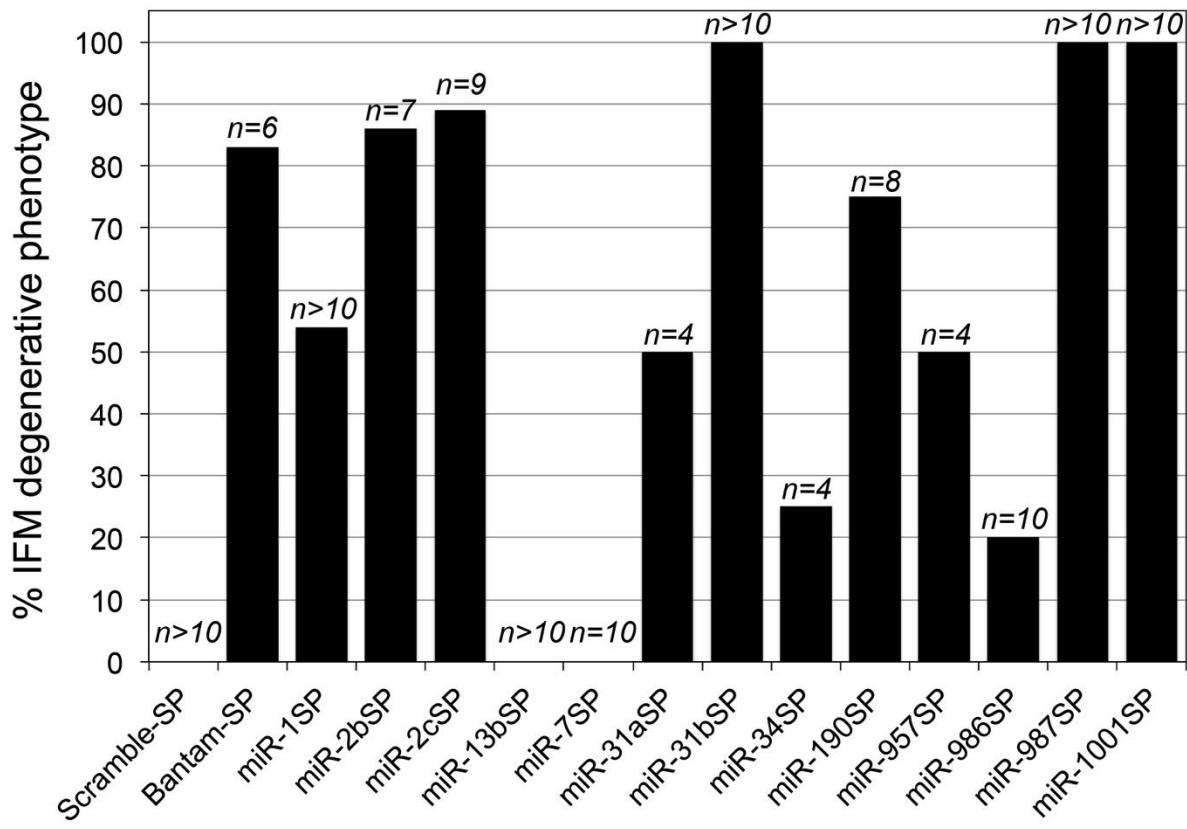

**Supplementary Figure 4:** Penetrance of IFM gross morphology phenotypes as assessed by anti-Mhc antibody and phalloidin staining of all positive hits from the primary flight screen. n = IFM Hemisegment.

| dme-miRNA                   | Human ortholog                    | Functions                                                                 | Methods                            | Models                                                                                                                          | References                                                                                                                                                     |
|-----------------------------|-----------------------------------|---------------------------------------------------------------------------|------------------------------------|---------------------------------------------------------------------------------------------------------------------------------|----------------------------------------------------------------------------------------------------------------------------------------------------------------|
| miR-1                       | miR-1, 122, 206                   | Muscle development<br>Muscle adaptation<br>Muscle diseases                | Overexpression<br>LOF<br>Profiling | <i>D. melanogaster</i><br><i>C. elegans</i><br><i>Homo sapiens</i><br><i>Mus musculus</i><br><i>Danio rerio</i><br>Cell culture | Reviewed in:<br>Sokol, 2012<br>Kirby& McCarthy, 2013<br>Wang, 2013                                                                                             |
| K-box-miR (miR-2b, 2c, 13b) | miR-23                            | Muscular atrophy/hypertrophy                                              | Overexpression<br>Profiling        | <i>Homo sapiens</i><br><i>Mus musculus</i><br><i>Danio rerio</i><br>Cell culture                                                | Reviewed in:<br>Wang, 2013                                                                                                                                     |
| miR-7                       | miR-7                             | Muscle diseases (DM1)                                                     | Profiling                          | <i>Homo sapiens</i><br><i>Mus musculus</i>                                                                                      | Fernandez-Costa et al., 2013                                                                                                                                   |
| miR-31a, 31b                | miR-31                            | Muscle development<br>Muscle adaptation<br>Muscle diseases (DMD)<br>Aging | Overexpression<br>LOF<br>Profiling | <i>Homo sapiens</i><br><i>Mus musculus</i><br>Stem cells                                                                        | Crist et al., 2012<br>Greco et al., 2009<br>Cacchiarelli et al., 2011<br>Roberts et al., 2012<br>Dmitriev, 2013<br>Russel et al., 2013<br>Hamrick et al., 2010 |
| miR-34                      | miR-23a, 34b*, 34c-5p, 449a, 449b | Aging<br>Cell Death<br>Muscle diseases (DMD, myotonic dystrophy type-2)   | LOF<br>Profiling                   | <i>D. melanogaster</i><br><i>Mus musculus</i><br><i>Homo sapiens</i>                                                            | Greco et al., 2009<br>Roberts et al., 2012<br>Greco et al., 2012<br>Boon et al., 2013                                                                          |

**Supplementary Table 1:** miRNAs implicated in muscle function from our screen that have orthologs shown to have functions in muscle through overexpression, loss of function or profiling experiments in various model organisms.

### Supplementary References

1. Sokol, N. S. The Role of MicroRNAs in Muscle Development. *Curr. Top. Dev. Biol.* (2012). doi:10.1016/B978-0-12-387038-4.00003-3
2. Kirby, T. J. & McCarthy, J. J. MicroRNAs in skeletal muscle biology and exercise adaptation. *Free Radic. Biol. Med.* (2013). doi:10.1016/j.freeradbiomed.2013.07.004
3. Wang, X. H. MicroRNA in myogenesis and muscle atrophy. doi:10.1097/MCO.0b013e32835f81b9
4. Fernandez-Costa, J. M. *et al.* Expanded CTG repeats trigger miRNA alterations in *Drosophila* that are conserved in myotonic dystrophy type 1 patients. *Hum. Mol. Genet.* (2013). doi:10.1093/hmg/dd5478

5. Crist, C. G., Montarras, D. & Buckingham, M. Muscle satellite cells are primed for myogenesis but maintain quiescence with sequestration of Myf5 mRNA targeted by microRNA-31 in mRNP granules. *Cell Stem Cell* (2012). doi:10.1016/j.stem.2012.03.011
6. Greco, S. *et al.* Common micro-RNA signature in skeletal muscle damage and regeneration induced by Duchenne muscular dystrophy and acute ischemia. *FASEB J.* (2009). doi:10.1096/fj.08-128579
7. Cacchiarelli, D. *et al.* miR-31 modulates dystrophin expression: new implications for Duchenne muscular dystrophy therapy. *EMBO Rep.* (2011). doi:10.1038/embor.2010.208
8. Roberts, T. C. *et al.* Expression Analysis in Multiple Muscle Groups and Serum Reveals Complexity in the MicroRNA Transcriptome of the mdx Mouse with Implications for Therapy. *Mol. Ther. — Nucleic Acids* (2012). doi:10.1038/mtna.2012.26
9. Dmitriev, P. *et al.* Simultaneous miRNA and mRNA transcriptome profiling of human myoblasts reveals a novel set of myogenic differentiation-associated miRNAs and their target genes.
10. Russell, A. P. *et al.* Regulation of miRNAs in human skeletal muscle following acute endurance exercise and short-term endurance training. *J Physiol* **000**, 1–17 (2013).
11. Hamrick, M. W. *et al.* The adipokine leptin increases skeletal muscle mass and significantly alters skeletal muscle miRNA expression profile in aged mice. *Biochem. Biophys. Res. Commun.* (2010). doi:10.1016/j.bbrc.2010.08.079
12. Greco, S. *et al.* Deregulated microRNAs in myotonic dystrophy type 2. *PLoS One* (2012). doi:10.1371/journal.pone.0039732
13. Boon, R. A. *et al.* MicroRNA-34a regulates cardiac ageing and function. doi:10.1038/nature11919
